# Supplementary material for: Computational Analyses of YY1 and Its Target RKIP Reveal Their Diagnostic and Prognostic Roles in Lung Cancer
Source: MDPI journal article supplement (doi:10.3390/cancers14040922), 2022-02-12
Supplement: s1 [file s1]

# Computational Analyses of YY1 and Its Target RKIP Reveal Their Diagnostic and Prognostic Roles in Lung Cancer

Silvia Vivarelli, Luca Falzone, Caterina Maria Grillo, Benjamin Bonavida, Claudia Crimi, Ignazio La Mantia and Massimo Libra

Table S1. YY1-ChIP sequencing results (from 15,000 bp upwards to 5,000 bp downwards the TSS of *RKIP* gene).

| Cluster | Cluster Score | Genomic Size | Sample (Experiment ID)              | Genome Position           | Peak Point | Score | Signal Value | Q-Value (FDR%) |
|---------|---------------|--------------|-------------------------------------|---------------------------|------------|-------|--------------|----------------|
| 1       | 330           | 578          | H1-hESC from ENCODE 3 (ENCFF509GYP) | chr12:118120730-118121059 | 118120895  | 330   | 37,797       | 4,594          |
| 1       | 330           | 578          | K562 from ENCODE 3 (ENCFF024TJO)    | chr12:118120782-118121097 | 118120940  | 214   | 22,717       | 4,195          |
| 1       | 330           | 578          | SK-N-SH from ENCODE 3 (ENCFF363UWP) | chr12:118120754-118121103 | 118120929  | 157   | 23,994       | 2,834          |
| 1       | 330           | 578          | SK-N-SH from ENCODE 3 (ENCFF363UWP) | chr12:118120958-118121307 | 118121133  | 57    | 8,846        | 0,128          |
| 2       | 228           | 330          | H1-hESC from ENCODE 3 (ENCFF509GYP) | chr12:118121727-118122056 | 118121892  | 227   | 26,078       | 4,163          |
| 3       | 492           | 269          | liver from ENCODE 3 (ENCFF459TWF)   | chr12:118124490-118124758 | 118124613  | 491   | 79,719       | 4,772          |
| 4       | 328           | 376          | HepG2 from ENCODE 3 (ENCFF177YDT)   | chr12:118126119-118126494 | 118126307  | 328   | 43,354       | 4,539          |
| 5       | 789           | 322          | liver from ENCODE 3 (ENCFF459TWF)   | chr12:118126510-118126831 | 118126674  | 788   | 127,936      | 4,772          |
| 5       | 789           | 322          | liver from ENCODE 3 (ENCFF838VFX)   | chr12:118126554-118126811 | 118126665  | 512   | 74,049       | 4,760          |
| 6       | 361           | 584          | liver from ENCODE 3 (ENCFF459TWF)   | chr12:118131817-118132400 | 118132109  | 360   | 58,536       | 4,772          |
| 7       | 550           | 781          | A549 from ENCODE 3 (ENCFF613DTQ)    | chr12:118135676-118136199 | 118135938  | 222   | 32,101       | 3,872          |
| 7       | 550           | 781          | GM12878 from ENCODE 3 (ENCFF223MUF) | chr12:118135970-118136313 | 118136142  | 238   | 30,739       | 5,098          |
| 7       | 550           | 781          | HepG2 from ENCODE 3 (ENCFF177YDT)   | chr12:118135832-118136207 | 118136020  | 311   | 41,178       | 4,539          |
| 7       | 550           | 781          | HepG2 from ENCODE 3 (ENCFF177YDT)   | chr12:118136056-118136431 | 118136244  | 125   | 16,556       | 3,346          |
| 7       | 550           | 781          | liver from ENCODE 3 (ENCFF459TWF)   | chr12:118135854-118136064 | 118135927  | 550   | 89,210       | 4,772          |
| 7       | 550           | 781          | liver from ENCODE 3 (ENCFF838VFX)   | chr12:118135651-118136210 | 118135931  | 476   | 68,788       | 4,760          |
| 7       | 550           | 781          | SK-N-SH from ENCODE 3 (ENCFF363UWP) | chr12:118135809-118136158 | 118135984  | 197   | 30,081       | 3,680          |
| 8       | 421           | 631          | GM12878 from ENCODE 3 (ENCFF223MUF) | chr12:118136569-118136912 | 118136741  | 90    | 11,628       | 3,927          |
| 8       | 421           | 631          | GM12878 from ENCODE 3 (ENCFF223MUF) | chr12:118136856-118137199 | 118137028  | 50    | 6,510        | 1,542          |
| 8       | 421           | 631          | liver from ENCODE 3 (ENCFF459TWF)   | chr12:118136589-118137172 | 118136881  | 421   | 68,342       | 4,772          |
| 9       | 375           | 798          | HepG2 from ENCODE 3 (ENCFF177YDT)   | chr12:118139059-118139434 | 118139247  | 47    | 6,223        | 0,540          |
| 9       | 375           | 798          | liver from ENCODE 3 (ENCFF459TWF)   | chr12:118138683-118139266 | 118138975  | 374   | 60,788       | 4,772          |
| 9       | 375           | 798          | liver from ENCODE 3 (ENCFF459TWF)   | chr12:118138897-118139480 | 118139189  | 123   | 20,096       | 1,850          |

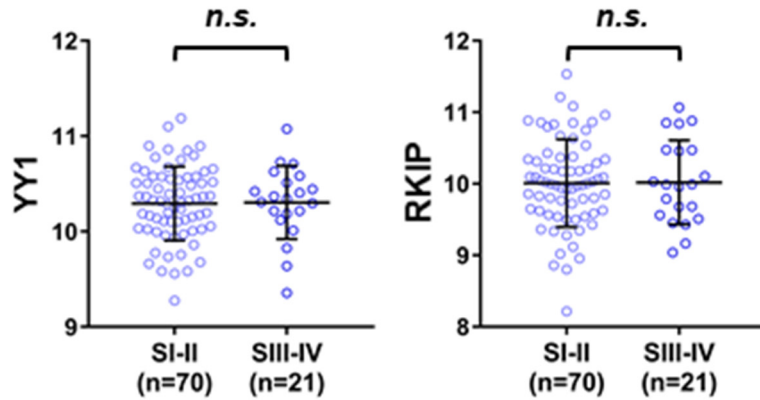

**Figure S1.** GSE2109, YY1 (left) and RKIP (right) expression in low stage (SI and SII) versus high stage (SIII and SIV) specimens.

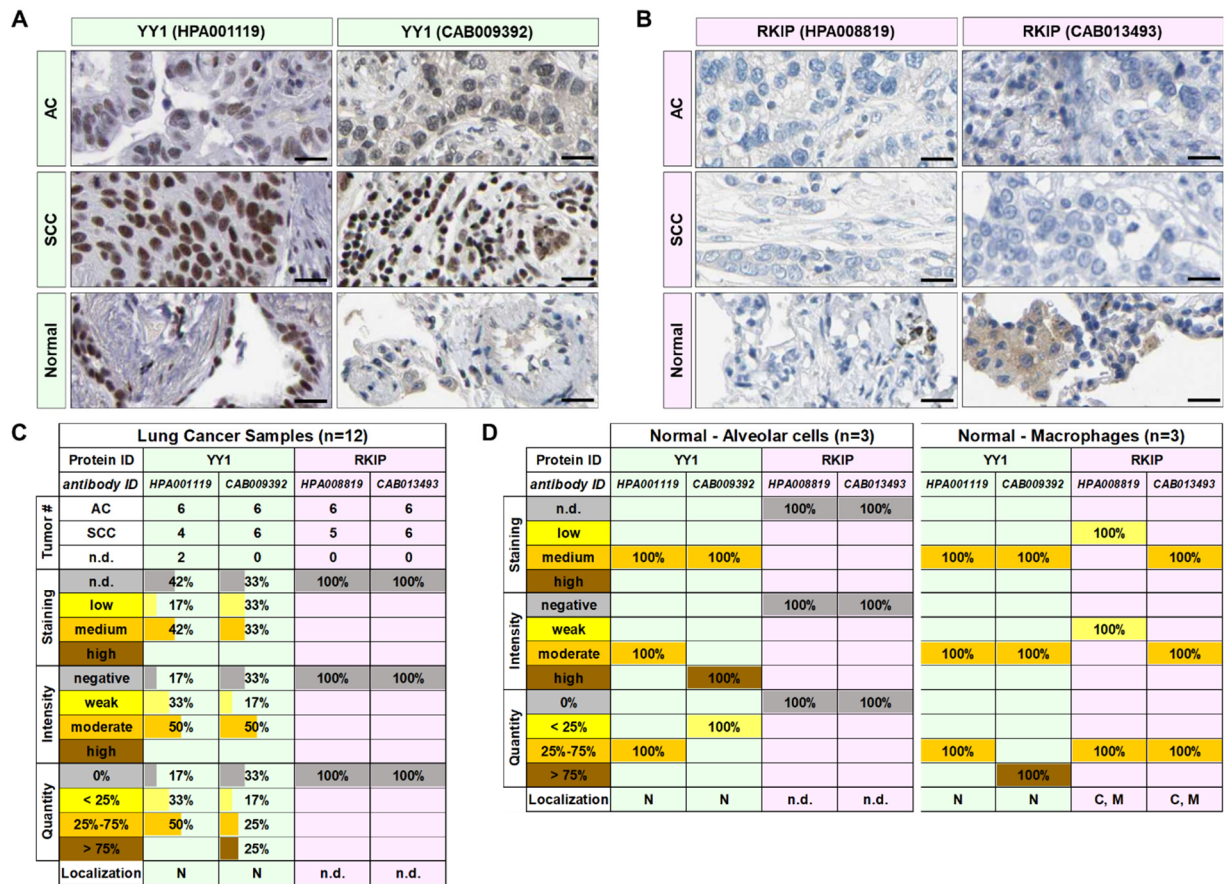

**Figure S2. Immunohistochemistry (IHC) analysis of YY1 and RKIP protein expression in Lung Cancer and Normal tissue from the Human Protein Atlas (HPA).** **A.** Representative images of Adenocarcinoma (AC), Squamous Cell Carcinoma (SCC) and Normal (non-transformed) formalin-fixed paraffin-embedded tissues stained with two YY1-specific HPA-validated antibodies (HPA001119 commercialized by Sigma-Aldrich, CAB009392 commercialized by Santa Cruz Biotechnology). Scale bar: 20µm. **B.** Representative images of AC, SCC and Normal tissues stained with two RKIP-specific HPA-validated antibodies (HPA008819 commercialized by Sigma-Aldrich, CAB013493 commercialized by Thermo Scientific). Scale bar: 20µm. **C.** Summary table for Lung cancer samples (n=12): Tumor type, Staining (quality), Intensity (of the staining, averaged), Quantity (of cells stained over the total), Localization (intracellular) of the signal (N, Nuclear; n.d., not determined). **D.** Summary table for Normal samples (n=3): Staining (quality), Intensity (of the staining, averaged), Quantity (of cells stained over the total), Localization (intracellular) of the signal (N, Nuclear; C, Cytoplasmic; M, Membranous; n.d., not determined).

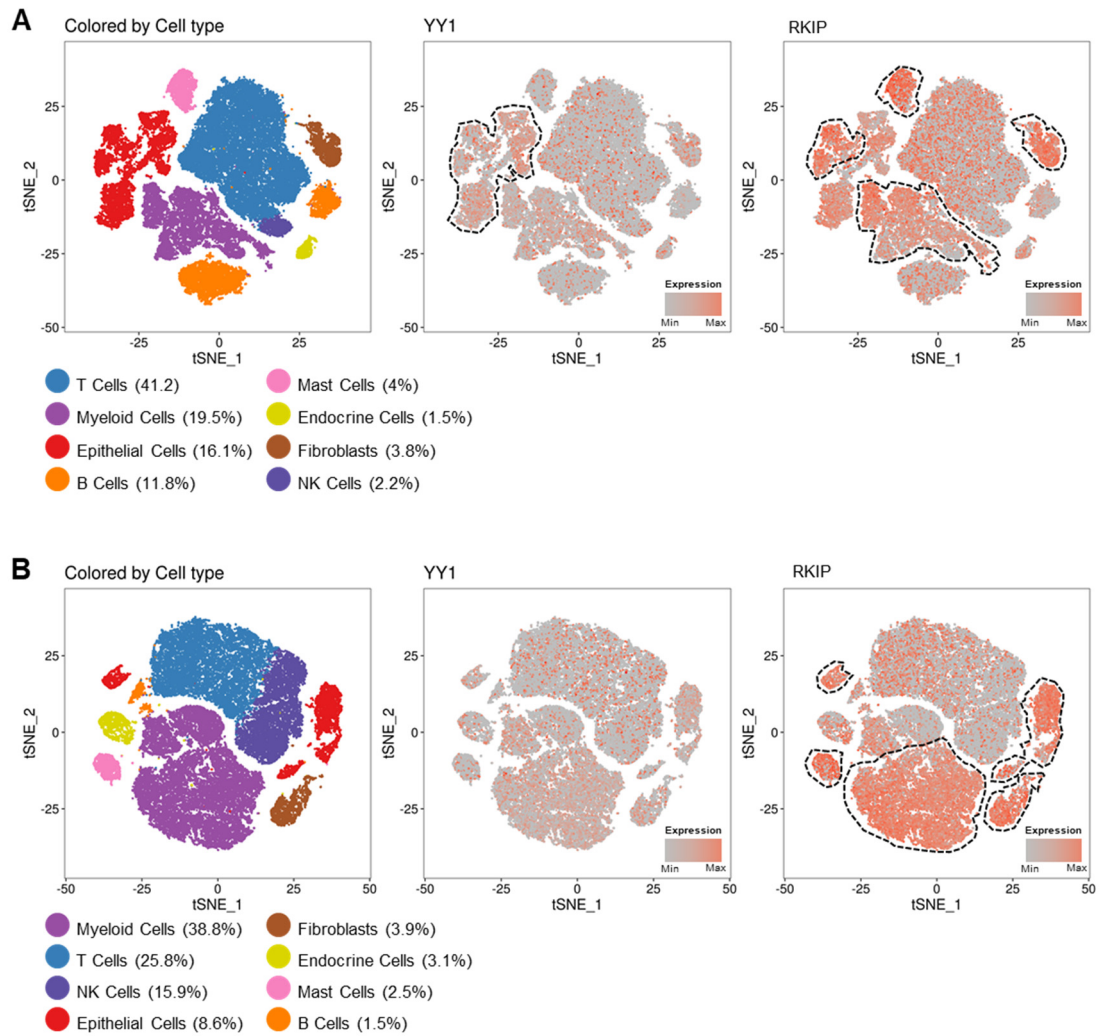

**Figure S2. Single cell sequencing analyses of GSE131907 single cell human LC dataset reveal an heterogeneous and cell-specific expression of YY1 and RKIP in both transformed and non-transformed tissues. A.** t-SNE plots of: cellular clusters distribution, YY1 and RKIP expression distribution in treatment-naïve lung adenocarcinoma cancer patients derived tumor tissue (45,149 cells). Dotted lines evidence clusters and subclusters with YY1 or RKIP high expression. **B.** t-SNE plots of: cellular clusters distribution, YY1 and RKIP expression distribution in treatment-naïve lung adenocarcinoma cancer patients derived non-tumor adjacent tissue (42,995 cells). Dotted clusters and subclusters with RKIP high expression.

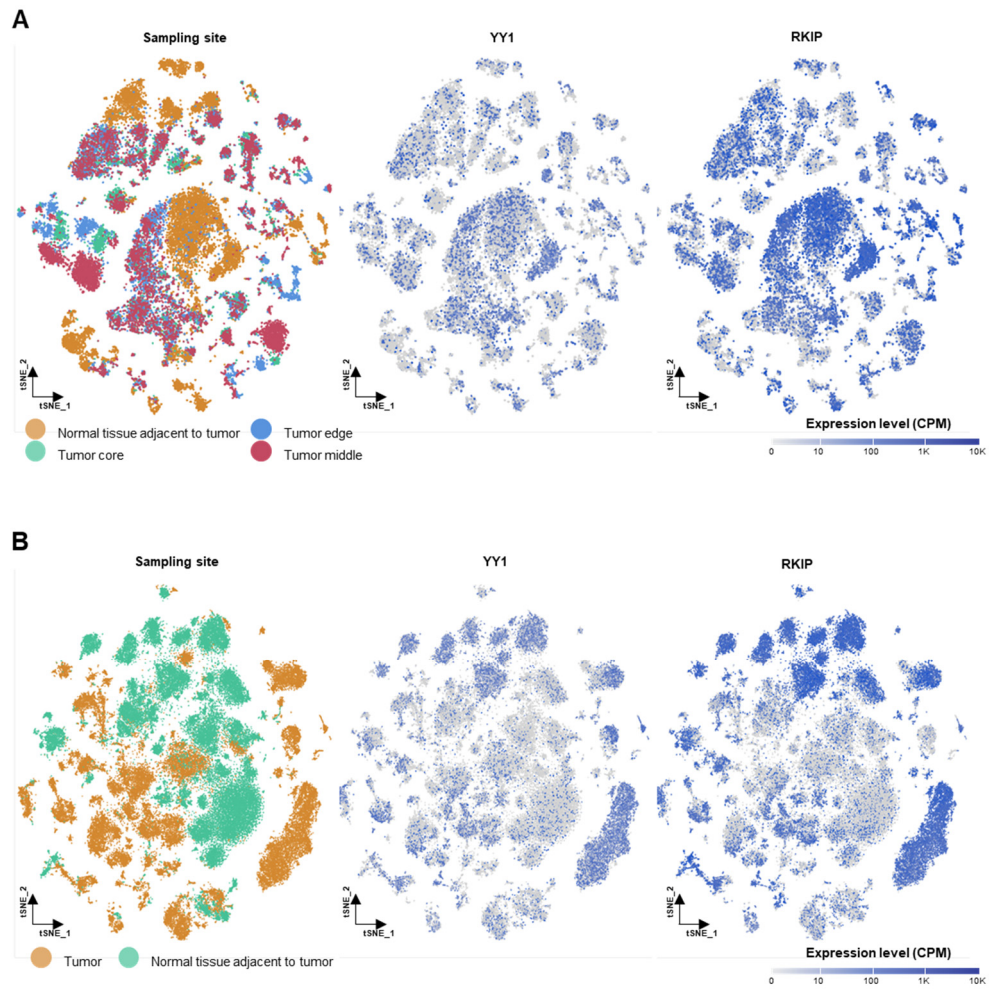

**Figure S3. Single cell sequencing analyses of deposited LC datasets reveal an heterogeneous and cell-specific expression of *YY1* and *RKIP* in both lung normal and lung cancer tissues, with an enrichment of *PEBP1* in normal tissues compared to tumor ones.** **A.** E-MTAB-6653 dataset (52,698 cells). t-SNE plots of cluster populations, *YY1* and *RKIP* gene expression in tumor and normal adjacent cells. **B.** E-MTAB-6308 dataset (56,771 cells), t-SNE plots of cluster populations, *YY1* and *RKIP* gene expression in tumor and normal adjacent cells.
